# Supplementary material for: Contribution of the precursors and interplay of the pathways in the phospholipid metabolism of the malaria parasite
Source: PubMed Central journal article supplement (PMC6071779; doi:10.1194/jlr.m085589), 2018-05-31
Supplement: 10.1194_M085589_jlr.M085589-1.pdf [file 10.1194_M085589_jlr.M085589-1.pdf]

## **SUPPLEMENTAL INFORMATION**

### **Contribution of the precursors and interplay of the pathways in the phospholipid metabolism of the malaria parasite**

Sharon Wein<sup>1\*#</sup>, Salma Ghezal<sup>2#</sup>, Corinne Buré<sup>3</sup>, Marjorie Maynadier<sup>1</sup>, Christian Périgaud<sup>2</sup>, Henri J. Vial<sup>1</sup>, Isabelle Lefebvre-Tournier<sup>2</sup>, Kai Wengelnik<sup>1</sup>, Rachel Cerdan<sup>1</sup>

<sup>1</sup>Dynamique des Interactions Membranaires Normales et Pathologiques, UMR 5235, CNRS- Université de Montpellier, cc 107, place Eugène Bataillon, 34095 Montpellier Cedex 05, France.

<sup>2</sup>Institut des Biomolécules Max Mousseron, UMR 5247, CNRS- Université de Montpellier, cc 1705, place Eugène Bataillon, 34095 Montpellier Cedex 05, France.

<sup>3</sup>Chimie et Biologie des Membranes et des Nanoobjets, UMR 5248, Centre de Génomique Fonctionnelle, BP 68, Université Bordeaux 2, 146, rue Léo Saignat, 33076 Bordeaux cedex, France.

# These authors contributed equally to this work.

**Supplemental Table S1. Labeling of PC, PE, PS, their precursors and the reaction intermediates found in *P. falciparum*-iRBC.**

|                | <i>Metabolite labeling (%)</i> |                      |                      |                      |
|----------------|--------------------------------|----------------------|----------------------|----------------------|
|                | <b>UL</b>                      | <b>d<sub>3</sub></b> | <b>d<sub>4</sub></b> | <b>d<sub>9</sub></b> |
| <b>PC</b>      | 89.5 ± 3.0                     | 0.6 ± 0.3            | 4.5 ± 1.4            | 5.4 ± 2.1            |
| <b>PE</b>      | 56.8 ± 12.0                    | 8.5 ± 1.0            | 34.7 ± 11.0          | NA                   |
| <b>PS</b>      | 86 ± 3.4                       | 14.0 ± 3.4           | NA                   | NA                   |
| <b>Cho</b>     | 92.4 ± 2.3                     | NA                   | NA                   | 7.6 ± 2.3            |
| <b>P-Cho</b>   | 89.2 ± 1.3                     | 0.8 ± 0.5            | 4.6 ± 1.8            | 5.5 ± 1.5            |
| <b>CDP-Cho</b> | 87.7 ± 7.7                     | 0.7 ± 0.7            | 6.0 ± 0.3            | 6.9 ± 6.0            |
| <b>P-Etn</b>   | 42.7 ± 15.5                    | 6.7 ± 4.6            | 50.7 ± 15.2          | NA                   |
| <b>CDP-Etn</b> | 36.8 ± 23.0                    | 6.3 ± 2.0            | 56.8 ± 21.0          | NA                   |
| <b>Ser</b>     | 71.9 ± 17.8                    | 28.1 ± 17.8          | NA                   | NA                   |

Cells were cultured in presence of human serum and 20 µM Cho-d<sub>9</sub>, 10 µM Etn-d<sub>4</sub> and 140 µM Ser-d<sub>3</sub>. Values are the mean of at least 3 independent experiments ± s.d.

UL: unlabeled; d<sub>9</sub>: d<sub>9</sub> labeling (from choline-d<sub>9</sub>), d<sub>4</sub> labeling (from ethanolamine-d<sub>4</sub>), d<sub>3</sub> labeling (from serine-d<sub>3</sub>), NA: not applicable.

**Supplemental Table S2. Phosphatidylcholine species in uRBC and *P. falciparum*-iRBC (3D7 and *pfpm1*Δ strains).** *P. falciparum*-iRBC were incubated 48h in culture medium supplemented with 10% human serum in the presence of 20 μM Cho-d<sub>9</sub>, 10 μM Etn-d<sub>4</sub> and 140 μM Ser-d<sub>3</sub>. After incubation, PLs were extracted, identified and quantified by LC-MS/MS. Gray color indicate the main changes in PC molecular species between RBCs and iRBCs.

|                                                  | RBC<br>(% of total PC) |                 | 3D7 <i>P. f.</i> -iRBC<br>(% of total PC) |                 | <i>pfpm1</i> Δ <i>P. f.</i> -iRBC<br>(% of total PC) |                 |
|--------------------------------------------------|------------------------|-----------------|-------------------------------------------|-----------------|------------------------------------------------------|-----------------|
|                                                  | Mean                   | s.e.m.<br>(n=3) | Mean                                      | s.e.m.<br>(n=7) | Mean                                                 | s.e.m.<br>(n=3) |
| PC 14:0-16:1                                     | 3.67                   | 0.56            | 0.92                                      | 0.16            | 0.66                                                 | 0.11            |
| PC 16:0/16:0                                     | 4.28                   | 0.11            | 13.01                                     | 1.29            | 15.39                                                | 1.27            |
| PC 14:0-18:1                                     | 1.11                   | 0.24            | 1.96                                      | 0.48            | 1.25                                                 | 0.05            |
| PC 14:0-18:2                                     | 0.16                   | 0.01            | 0.28                                      | 0.05            | 0.17                                                 | 0.01            |
| PC 16:0-18:0                                     | 5.78                   | 2.31            | 11.70                                     | 3.22            | 9.12                                                 | 1.40            |
| PC 16:0-18:1                                     | 22.57                  | 1.21            | 32.42                                     | 1.94            | 29.60                                                | 0.81            |
| PC 16:0-18:2                                     | 22.91                  | 0.49            | 14.99                                     | 0.89            | 13.95                                                | 0.79            |
| PC 18:0-18:1                                     | 5.46                   | 0.55            | 6.12                                      | 0.33            | 6.52                                                 | 0.54            |
| PC 18:0-18:2 +<br>PC 18:1/18:1                   | 10.75                  | 1.02            | 5.89                                      | 0.33            | 5.71                                                 | 0.39            |
| PC 16:0-20:3 +<br>PC 18:1-18:2                   | 6.46                   | 0.37            | 3.21                                      | 0.19            | 3.71                                                 | 0.36            |
| PC 16:1-20:3 +<br>PC 16:0-20:4 +<br>PC 18:2/18:2 | 7.41                   | 0.73            | 4.28                                      | 0.30            | 6.73                                                 | 1.12            |
| PC 38:3                                          | 1.17                   | 0.16            | 0.69                                      | 0.06            | 0.97                                                 | 0.01            |
| PC 18:0-20:4 +<br>PC 18:1-20:3                   | 3.69                   | 0.08            | 1.73                                      | 0.15            | 2.51                                                 | 0.23            |
| PC 38:5                                          | 1.91                   | 0.27            | 1.15                                      | 0.10            | 1.61                                                 | 0.15            |
| PC 16:0-22:6                                     | 2.15                   | 0.24            | 1.30                                      | 0.10            | 1.78                                                 | 0.19            |
| PC 40:4                                          | 0.15                   | 0.01            | 0.07                                      | 0.01            | 0.10                                                 | 0.01            |
| PC 40:5                                          | 0.34                   | 0.07            | 0.17                                      | 0.02            | 0.24                                                 | 0.01            |

PC: phosphatidylcholine

**Supplemental Table S3. Phosphatidylethanolamine species in uninfected RBC and *P. falciparum*-iRBC (3D7 and *pfpmt* $\Delta$  strains).** *P. falciparum*-iRBC were incubated 48h in culture medium supplemented with 10% human serum in the presence of 20  $\mu$ M Cho-d<sub>9</sub>, 10  $\mu$ M Etn-d<sub>4</sub> and 140  $\mu$ M Ser-d<sub>3</sub>. After incubation, PLs were extracted, identified and quantified by LC-MS/MS. Gray color indicate the main change in PE molecular species between RBCs and iRBCs.

| Species      | RBC<br>(% of total PE) |                 | 3D7 <i>P. f.</i> -iRBC<br>(% of total PE) |                 | <i>pfpmt</i> $\Delta$ <i>P. f.</i> -iRBC<br>(% of total PE) |                 |
|--------------|------------------------|-----------------|-------------------------------------------|-----------------|-------------------------------------------------------------|-----------------|
|              | Mean                   | s.e.m.<br>(n=3) | Mean                                      | s.e.m.<br>(n=3) | Mean                                                        | s.e.m.<br>(n=3) |
| PE 14:0/18:1 | <b>0.22</b>            | 0.03            | <b>0.55</b>                               | 0.12            | <b>0.47</b>                                                 | 0.05            |
| PE 14:0/18:2 | <b>0.09</b>            | 0.01            | <b>0.50</b>                               | 0.14            | <b>0.47</b>                                                 | 0.08            |
| PE 16:0/16:0 | <b>0.77</b>            | 0.12            | <b>2.39</b>                               | 0.48            | <b>2.24</b>                                                 | 0.83            |
| PE 16:0/18:0 | <b>0.24</b>            | 0.01            | <b>0.43</b>                               | 0.14            | <b>1.05</b>                                                 | 0.34            |
| PE 16:0/18:1 | <b>23.49</b>           | 0.68            | <b>29.14</b>                              | 1.04            | <b>27.46</b>                                                | 0.80            |
| PE 16:0/18:2 | <b>8.17</b>            | 0.38            | <b>26.90</b>                              | 0.91            | <b>24.60</b>                                                | 1.49            |
| PE 16:0/20:1 | <b>0.23</b>            | 0.01            | <b>0.14</b>                               | 0.06            | <b>0.21</b>                                                 | 0.03            |
| PE 16:0/20:3 | <b>0.39</b>            | 0.20            | <b>0.42</b>                               | 0.12            | <b>0.00</b>                                                 | 0.00            |
| PE 16:0/20:4 | <b>12.54</b>           | 1.16            | <b>9.92</b>                               | 0.90            | <b>13.35</b>                                                | 0.83            |
| PE 16:0/22:4 | <b>3.84</b>            | 0.12            | <b>0.83</b>                               | 0.09            | <b>0.64</b>                                                 | 0.06            |
| PE 16:0/22:5 | <b>2.24</b>            | 0.21            | <b>0.69</b>                               | 0.16            | <b>1.17</b>                                                 | 0.02            |
| PE 16:0/22:6 | <b>2.58</b>            | 0.39            | <b>1.12</b>                               | 0.12            | <b>1.13</b>                                                 | 0.06            |
| PE 18:0/18:1 | <b>6.85</b>            | 0.27            | <b>4.82</b>                               | 0.64            | <b>5.88</b>                                                 | 0.40            |
| PE 18:0/18:2 | <b>2.25</b>            | 0.15            | <b>3.32</b>                               | 0.25            | <b>4.89</b>                                                 | 0.43            |
| PE 18:0/20:3 | <b>0.59</b>            | 0.30            | <b>0.78</b>                               | 0.18            | <b>1.24</b>                                                 | 0.27            |
| PE 18:0/20:4 | <b>9.02</b>            | 0.38            | <b>4.11</b>                               | 0.38            | <b>4.72</b>                                                 | 0.71            |
| PE 18:0/22:4 | <b>1.30</b>            | 0.09            | <b>0.27</b>                               | 0.07            | <b>0.24</b>                                                 | 0.01            |
| PE 18:1/18:1 | <b>7.57</b>            | 0.55            | <b>3.23</b>                               | 0.46            | <b>2.87</b>                                                 | 0.34            |
| PE 18:1/18:2 | <b>7.30</b>            | 0.38            | <b>2.92</b>                               | 0.68            | <b>4.06</b>                                                 | 0.26            |
| PE 18:1/20:3 | <b>0.93</b>            | 0.07            | <b>0.12</b>                               | 0.06            | <b>0.00</b>                                                 | 0.00            |
| PE 18:1/20:4 | <b>7.66</b>            | 0.40            | <b>1.60</b>                               | 0.12            | <b>1.61</b>                                                 | 0.11            |
| PE 18:1/22:4 | <b>1.08</b>            | 0.09            | <b>0.10</b>                               | 0.04            | <b>0.12</b>                                                 | 0.01            |
| PE 18:2/18:2 | <b>0.66</b>            | 0.02            | <b>0.61</b>                               | 0.30            | <b>1.57</b>                                                 | 0.13            |

PE: phosphatidylethanolamine

**Supplemental Table S4. Phosphatidylserine species in uninfected RBC and *P. falciparum*-iRBC (3D7 and *pfpm* $\Delta$  strains).** *P. falciparum*-iRBC were incubated 48h in culture medium supplemented with 10% human serum in the presence of 20  $\mu$ M Cho-d<sub>9</sub>, 10  $\mu$ M Etn-d<sub>4</sub> and 140  $\mu$ M Ser-d<sub>3</sub>. After incubation, PLs were extracted, identified and quantified by LC-MS/MS. Gray color indicate the main changes in PS molecular species between RBCs and iRBCs.

| Species      | RBC<br>(% of total PS) |                 | 3D7 <i>P. f.</i> -iRBC<br>(% of total PS) |                 | <i>pfpm</i> $\Delta$ <i>P. f.</i> -iRBC<br>(% of total PS) |                 |
|--------------|------------------------|-----------------|-------------------------------------------|-----------------|------------------------------------------------------------|-----------------|
|              | Mean                   | s.e.m.<br>(n=3) | Mean                                      | s.e.m.<br>(n=7) | Mean                                                       | s.e.m.<br>(n=3) |
| PS 16:0-18:0 | 3.85                   | 0.77            | 3.54                                      | 0.63            | 4.25                                                       | 0.53            |
| PS 16:0-18:1 | 0.81                   | 0.16            | 10.62                                     | 1.41            | 12.85                                                      | 1.42            |
| PS 16:0-18:2 | 0.00                   | 0.00            | 4.56                                      | 0.89            | 5.90                                                       | 0.94            |
| PS 16:0-20:1 | 0.00                   | 0.00            | 0.19                                      | 0.16            | 0.00                                                       | 0.00            |
| PS 16:0-22:4 | 0.15                   | 0.10            | 0.00                                      | 0.00            | 0.00                                                       | 0.00            |
| PS 16:0-22:5 | 0.00                   | 0.00            | 0.03                                      | 0.03            | 0.00                                                       | 0.00            |
| PS 16:0-22:6 | 0.00                   | 0.00            | 0.39                                      | 0.30            | 0.00                                                       | 0.00            |
| PS 18:0-18:1 | 9.44                   | 0.69            | 14.96                                     | 0.93            | 16.36                                                      | 1.46            |
| PS 18:0-18:2 | 2.85                   | 0.12            | 9.26                                      | 0.51            | 11.28                                                      | 0.20            |
| PS 18:0-20:3 | 6.60                   | 0.37            | 4.83                                      | 0.69            | 5.33                                                       | 0.26            |
| PS 18:0-20:4 | 63.11                  | 1.97            | 32.72                                     | 2.45            | 29.04                                                      | 1.61            |
| PS 18:0-22:4 | 8.58                   | 0.76            | 4.66                                      | 0.86            | 3.17                                                       | 0.39            |
| PS 18:1/18:1 | 0.79                   | 0.07            | 5.83                                      | 1.02            | 3.91                                                       | 0.15            |
| PS 18:1-18:2 | 0.16                   | 0.03            | 3.41                                      | 0.63            | 3.47                                                       | 0.12            |
| PS 18:1-20:3 | 0.40                   | 0.11            | 0.50                                      | 0.19            | 0.00                                                       | 0.00            |
| PS 18:1-20:4 | 3.86                   | 1.02            | 3.80                                      | 0.39            | 4.44                                                       | 0.43            |
| PS 18:1-22:4 | 0.29                   | 0.15            | 0.00                                      | 0.00            | 0.00                                                       | 0.00            |
| PS 18:2/18:2 | 0.00                   | 0.00            | 0.24                                      | 0.12            | 0.00                                                       | 0.00            |

PS: phosphatidylserine

**Supplemental Table S5. Molecular species of PC in the 3D7 strain according to the precursor of PLs.** *P. falciparum*-iRBC were incubated 48h in culture medium supplemented with 10% human serum in the presence of 20  $\mu$ M Cho-d<sub>9</sub>, 10  $\mu$ M Etn-d<sub>4</sub> and 140  $\mu$ M Ser-d<sub>3</sub>. After incubation, PLs were extracted, identified and quantified by LC-MS/MS. Values are the mean  $\pm$  s.e.m. (n=4). Gray color indicate the main changes in PC molecular species between unlabeled and labeled PC.

|                                            | Unlabeled PC |           | PC-d <sub>3</sub> |           | PC-d <sub>4</sub> |           | PC-d <sub>9</sub> |           |
|--------------------------------------------|--------------|-----------|-------------------|-----------|-------------------|-----------|-------------------|-----------|
|                                            | mean (%)     | s.e.m (%) | mean (%)          | s.e.m (%) | mean (%)          | s.e.m (%) | mean (%)          | s.e.m (%) |
| PC 14:0-16:1                               | <b>0.64</b>  | 0.19      | <b>0</b>          | 0         | <b>0.06</b>       | 0.04      | <b>0.05</b>       | 0.03      |
| PC 16:0/16:0                               | <b>12.05</b> | 1.46      | <b>13.01</b>      | 0.99      | <b>12.78</b>      | 1.72      | <b>12.79</b>      | 1.83      |
| PC 14:0-18:1                               | <b>2.26</b>  | 0.67      | <b>1.15</b>       | 0.39      | <b>2.53</b>       | 0.62      | <b>2.57</b>       | 0.53      |
| PC 14:0-18:2                               | <b>0.32</b>  | 0.07      | <b>0.07</b>       | 0.07      | <b>0.24</b>       | 0.08      | <b>0.26</b>       | 0.09      |
| PC 16:0-18:0                               | <b>13.04</b> | 3.29      | <b>4.87</b>       | 2.14      | <b>3.70</b>       | 0.98      | <b>3.63</b>       | 0.82      |
| PC 16:0-18:1                               | <b>32.67</b> | 3.07      | <b>43.45</b>      | 5.35      | <b>40.22</b>      | 1.22      | <b>40.63</b>      | 1.63      |
| PC 16:0-18:2                               | <b>14.76</b> | 1.12      | <b>17.59</b>      | 2.21      | <b>16.76</b>      | 1.36      | <b>15.83</b>      | 0.89      |
| PC 18:0-18:1                               | <b>5.87</b>  | 0.29      | <b>5.89</b>       | 0.41      | <b>5.81</b>       | 0.71      | <b>6.31</b>       | 0.32      |
| PC 18:0-18:2 + PC 18:1/18:1                | <b>5.82</b>  | 0.54      | <b>4.91</b>       | 1.86      | <b>5.76</b>       | 0.16      | <b>5.82</b>       | 0.21      |
| PC 16:0-20:3 + PC 18:1-18:2                | <b>3.27</b>  | 0.43      | <b>2.58</b>       | 0.89      | <b>3.29</b>       | 0.16      | <b>3.43</b>       | 0.16      |
| PC 16:1-20:3 + PC 16:0-20:4 + PC 18:2/18:2 | <b>4.15</b>  | 0.44      | <b>3.04</b>       | 1.25      | <b>4.51</b>       | 0.18      | <b>4.36</b>       | 0.13      |
| PC 36:8                                    | <b>0.18</b>  | 0.00      | <b>0</b>          | 0         | <b>0.19</b>       | 0.00      | <b>0.20</b>       | 0.00      |
| PC 38:3                                    | <b>0.65</b>  | 0.08      | <b>0.14</b>       | 0.14      | <b>0.40</b>       | 0.15      | <b>0.38</b>       | 0.13      |
| PC 18:0-20:4 + PC 18:1-20:3                | <b>1.66</b>  | 0.29      | <b>1.31</b>       | 0.58      | <b>1.39</b>       | 0.18      | <b>1.23</b>       | 0.42      |
| PC 38:5                                    | <b>1.23</b>  | 0.23      | <b>0.56</b>       | 0.42      | <b>0.92</b>       | 0.33      | <b>1.00</b>       | 0.35      |
| PC 16:0-22:6                               | <b>1.35</b>  | 0.22      | <b>0.84</b>       | 0.50      | <b>1.38</b>       | 0.26      | <b>1.44</b>       | 0.14      |
| PC 40:4                                    | <b>0.06</b>  | 0.02      | <b>0</b>          | 0         | <b>0.05</b>       | 0.02      | <b>0.06</b>       | 0.03      |
| PC 40:5                                    | <b>0.16</b>  | 0.04      | <b>0</b>          | 0         | <b>0.14</b>       | 0.06      | <b>0.17</b>       | 0.06      |
| Total                                      | 100%         |           | 100%              |           | 100%              |           | 100%              |           |

**Supplemental Table S6. Molecular species of PC in *pfpm1Δ* strain according to the source of PLs. *P.***

*falciparum*-iRBC were incubated 48h in culture medium supplemented with 10% human serum in the presence of 20 μM Cho-d<sub>9</sub>, 10 μM Etn-d<sub>4</sub> and 140 μM Ser-d<sub>3</sub>. After incubation, phospholipids were extracted, identified and quantified by LC-MS/MS. Results are mean ± s.e.m. (n=3).

|                                                   | Unlabeled PC |           | PC-d <sub>9</sub> |           |
|---------------------------------------------------|--------------|-----------|-------------------|-----------|
|                                                   | mean (%)     | s.e.m (%) | mean (%)          | s.e.m (%) |
| <b>PC 14:0-16:1</b>                               | <b>0.67</b>  | 0.11      | <b>0.00</b>       | 0.00      |
| <b>PC 16:0/16:0</b>                               | <b>15.47</b> | 1.27      | <b>11.15</b>      | 1.53      |
| <b>PC 14:0-18:1</b>                               | <b>1.24</b>  | 0.04      | <b>1.96</b>       | 0.75      |
| <b>PC 14:0-18:2</b>                               | <b>0.17</b>  | 0.01      | <b>0.00</b>       | 0.00      |
| <b>PC 16:0-18:0</b>                               | <b>9.16</b>  | 1.42      | <b>7.54</b>       | 0.99      |
| <b>PC 16:0-18:1</b>                               | <b>29.62</b> | 0.77      | <b>28.18</b>      | 3.90      |
| <b>PC 16:0-18:2</b>                               | <b>13.95</b> | 0.79      | <b>13.87</b>      | 0.79      |
| <b>PC 18:0-18:1</b>                               | <b>6.54</b>  | 0.54      | <b>5.66</b>       | 0.73      |
| <b>PC 18:0-18:2 + PC 18:1/18:1</b>                | <b>5.69</b>  | 0.41      | <b>6.79</b>       | 0.58      |
| <b>PC 16:0-20:3 + PC 18:1-18:2</b>                | <b>3.69</b>  | 0.37      | <b>4.58</b>       | 0.36      |
| <b>PC 16:1-20:3 + PC 16:0-20:4 + PC 18:2/18:2</b> | <b>6.68</b>  | 1.12      | <b>9.24</b>       | 1.36      |
| <b>PC 38:3</b>                                    | <b>0.93</b>  | 0.03      | <b>2.84</b>       | 0.73      |
| <b>PC 18:0-20:4 + PC 18:1-20:3</b>                | <b>2.51</b>  | 0.23      | <b>2.58</b>       | 0.12      |
| <b>PC 38:5</b>                                    | <b>1.58</b>  | 0.16      | <b>2.83</b>       | 0.45      |
| <b>PC 16:0-22:6</b>                               | <b>1.76</b>  | 0.20      | <b>2.55</b>       | 0.09      |
| <b>PC 40:4</b>                                    | <b>0.11</b>  | 0.01      | <b>0.00</b>       | 0.00      |
| <b>PC 40:5</b>                                    | <b>0.24</b>  | 0.01      | <b>0.22</b>       | 0.22      |
| Total                                             | 100%         |           | 100%              |           |

**Supplemental Table S7. Molecular species of PE in 3D7 strain according to the source of PLs. *P.***

*falciparum*-iRBC were incubated 48h in culture medium supplemented with 10% human serum in the presence of 20  $\mu$ M Cho-d<sub>9</sub>, 10  $\mu$ M Etn-d<sub>4</sub> and 140  $\mu$ M Ser-d<sub>3</sub>. After incubation, phospholipids were extracted, identified and quantified by LC-MS/MS. Results are mean  $\pm$  s.e.m. (n=4). Gray color indicate the main change in PE molecular species between unlabeled and labeled PE.

|              | Unlabeled PE |           | PE-d <sub>3</sub> |           | PE-d <sub>4</sub> |           |
|--------------|--------------|-----------|-------------------|-----------|-------------------|-----------|
|              | mean (%)     | s.e.m (%) | mean (%)          | s.e.m (%) | mean (%)          | s.e.m (%) |
| PE 14:0-18:1 | <b>0.64</b>  | 0.10      | <b>0.47</b>       | 0.24      | <b>0.60</b>       | 0.17      |
| PE 14:0-18:2 | <b>0.48</b>  | 0.09      | <b>0.50</b>       | 0.32      | <b>0.51</b>       | 0.21      |
| PE 16:0/16:0 | <b>1.97</b>  | 0.52      | <b>2.17</b>       | 0.61      | <b>2.03</b>       | 0.54      |
| PE 16:0-18:0 | <b>0.59</b>  | 0.19      | <b>0.07</b>       | 0.07      | <b>0.48</b>       | 0.14      |
| PE 16:0-18:1 | <b>30.25</b> | 0.94      | <b>31.01</b>      | 2.12      | <b>31.80</b>      | 1.51      |
| PE 16:0-18:2 | <b>24.51</b> | 1.47      | <b>24.00</b>      | 1.41      | <b>31.43</b>      | 1.98      |
| PE 16:0-20:1 | <b>0.18</b>  | 0.08      | <b>0.05</b>       | 0.05      | <b>0.12</b>       | 0.07      |
| PE 16:0-20:3 | <b>0.55</b>  | 0.19      | <b>0.73</b>       | 0.73      | <b>0.40</b>       | 0.23      |
| PE 16:0-20:4 | <b>9.38</b>  | 0.79      | <b>10.55</b>      | 2.02      | <b>9.50</b>       | 1.09      |
| PE 16:0-22:4 | <b>1.30</b>  | 0.08      | <b>0.43</b>       | 0.16      | <b>0.77</b>       | 0.20      |
| PE 16:0-22:5 | <b>0.76</b>  | 0.27      | <b>0.25</b>       | 0.14      | <b>0.44</b>       | 0.17      |
| PE 16:0-22:6 | <b>1.25</b>  | 0.16      | <b>0.76</b>       | 0.57      | <b>1.19</b>       | 0.35      |
| PE 18:0-18:1 | <b>6.57</b>  | 0.81      | <b>7.26</b>       | 0.16      | <b>4.57</b>       | 0.41      |
| PE 18:0-18:2 | <b>4.01</b>  | 0.64      | <b>4.24</b>       | 1.03      | <b>2.92</b>       | 0.53      |
| PE 18:0-20:3 | <b>0.91</b>  | 0.09      | <b>0.22</b>       | 0.13      | <b>0.84</b>       | 0.30      |
| PE 18:0-20:4 | <b>4.97</b>  | 0.33      | <b>4.56</b>       | 2.53      | <b>3.00</b>       | 0.48      |
| PE 18:0-22:4 | <b>0.53</b>  | 0.05      | <b>0.05</b>       | 0.05      | <b>0.19</b>       | 0.04      |
| PE 18:1/18:1 | <b>4.83</b>  | 1.01      | <b>5.86</b>       | 1.24      | <b>2.52</b>       | 0.40      |
| PE 18:1-18:2 | <b>3.18</b>  | 0.14      | <b>4.32</b>       | 0.31      | <b>4.13</b>       | 2.57      |
| PE 18:1-20:3 | <b>0.33</b>  | 0.11      | <b>0.08</b>       | 0.05      | <b>0.20</b>       | 0.11      |
| PE 18:1-20:4 | <b>2.07</b>  | 0.16      | <b>1.73</b>       | 0.32      | <b>1.03</b>       | 0.25      |
| PE 18:1-22:4 | <b>0.25</b>  | 0.05      | <b>0.01</b>       | 0.01      | <b>0.00</b>       | 0.00      |
| PE 18:2/18:2 | <b>0.52</b>  | 0.05      | <b>0.71</b>       | 0.29      | <b>1.35</b>       | 1.22      |
| Total        | 100%         |           | 100%              |           | 100%              |           |



**Supplemental Table S8. Molecular species of PS in 3D7 strain according to the source of PLs.** *P. falciparum*-iRBC were incubated 48h in culture medium supplemented with 10% human serum in the presence of 20  $\mu$ M Cho-d<sub>9</sub>, 10  $\mu$ M Etn-d<sub>4</sub> and 140  $\mu$ M Ser-d<sub>3</sub>. After incubation, phospholipids were extracted, identified and quantified by LC-MS/MS. Results are mean  $\pm$  s.e.m. (n=4). Significant differences are shown ns: not significant, \* p<0.05, \*\* p<0.01, \*\*\* p<0.001, \*\*\*\* p<0.0001.

|                     | Unlabeled PS |           | PS-d <sub>3</sub> |           | Significant difference |
|---------------------|--------------|-----------|-------------------|-----------|------------------------|
|                     | mean (%)     | s.e.m (%) | mean (%)          | s.e.m (%) |                        |
| <b>PS 16:0-18:0</b> | <b>2.91</b>  | 0.75      | <b>0.00</b>       | 0.00      | **                     |
| <b>PS 16:0-18:1</b> | <b>11.23</b> | 0.92      | <b>20.45</b>      | 0.99      | **                     |
| <b>PS 16:0-18:2</b> | <b>3.74</b>  | 0.18      | <b>5.28</b>       | 1.21      | ns                     |
| <b>PS 16:0-20:1</b> | <b>1.95</b>  | 0.85      | <b>1.29</b>       | 0.71      | ns                     |
| <b>PS 18:0-18:1</b> | <b>15.58</b> | 0.68      | <b>20.92</b>      | 3.89      | ns                     |
| <b>PS 18:0-18:2</b> | <b>8.65</b>  | 0.30      | <b>15.11</b>      | 0.20      | ****                   |
| <b>PS 18:0-20:3</b> | <b>4.50</b>  | 0.26      | <b>0.11</b>       | 0.11      | ****                   |
| <b>PS 18:0-20:4</b> | <b>31.79</b> | 0.76      | <b>10.80</b>      | 5.40      | **                     |
| <b>PS 18:0-22:4</b> | <b>4.13</b>  | 0.65      | <b>0.00</b>       | 0.00      | **                     |
| <b>PS 18:1/18:1</b> | <b>6.98</b>  | 1.46      | <b>14.05</b>      | 1.18      | *                      |
| <b>PS 18:1-18:2</b> | <b>3.24</b>  | 0.20      | <b>7.21</b>       | 1.11      | **                     |
| <b>PS 18:1-20:3</b> | <b>0.90</b>  | 0.18      | <b>0.00</b>       | 0.00      | **                     |
| <b>PS 18:1-20:4</b> | <b>3.74</b>  | 0.41      | <b>4.78</b>       | 1.01      | ns                     |
| Total               | 100%         |           | 100%              |           |                        |

**Supplemental Table 9. Molecular species of PS in *pfpm1Δ* strain according to the source of PLs.** *P. falciparum*-iRBC were incubated 48h in culture medium supplemented with 10% human serum in the presence of 20 μM Cho-d<sub>9</sub>, 10 μM Etn-d<sub>4</sub> and 140 μM Ser-d<sub>3</sub>. After incubation, phospholipids were extracted, identified and quantified by LC-MS/MS. Results are mean ± s.e.m. (n=3).

|                     | PS-d <sub>0</sub> |           | PS-d <sub>3</sub> |           | Significant difference |
|---------------------|-------------------|-----------|-------------------|-----------|------------------------|
|                     | mean (%)          | s.e.m (%) | mean (%)          | s.e.m (%) |                        |
| <b>PS 16:0-18:0</b> | <b>4.91</b>       | 0.65      | <b>0.00</b>       | 0.00      | **                     |
| <b>PS 16:0-18:1</b> | <b>12.04</b>      | 1.52      | <b>18.14</b>      | 0.58      | *                      |
| <b>PS 16:0-18:2</b> | <b>5.57</b>       | 0.77      | <b>7.82</b>       | 1.89      | ns                     |
| <b>PS 18:0-18:1</b> | <b>15.88</b>      | 1.49      | <b>19.49</b>      | 1.53      | ns                     |
| <b>PS 18:0-18:2</b> | <b>11.25</b>      | 0.09      | <b>11.62</b>      | 0.90      | ns                     |
| <b>PS 18:0-20:3</b> | <b>5.55</b>       | 0.15      | <b>3.98</b>       | 1.01      | ns                     |
| <b>PS 18:0-20:4</b> | <b>30.26</b>      | 1.65      | <b>21.09</b>      | 1.06      | **                     |
| <b>PS 18:0-22:4</b> | <b>3.65</b>       | 0.41      | <b>0.00</b>       | 0.00      | ***                    |
| <b>PS 18:1/18:1</b> | <b>3.44</b>       | 0.21      | <b>6.94</b>       | 0.08      | ****                   |
| <b>PS 18:1-18:2</b> | <b>3.29</b>       | 0.11      | <b>4.64</b>       | 0.26      | **                     |
| <b>PS 18:1-20:4</b> | <b>4.16</b>       | 0.40      | <b>6.28</b>       | 0.59      | *                      |
| Total               | 100%              |           | 100%              |           |                        |

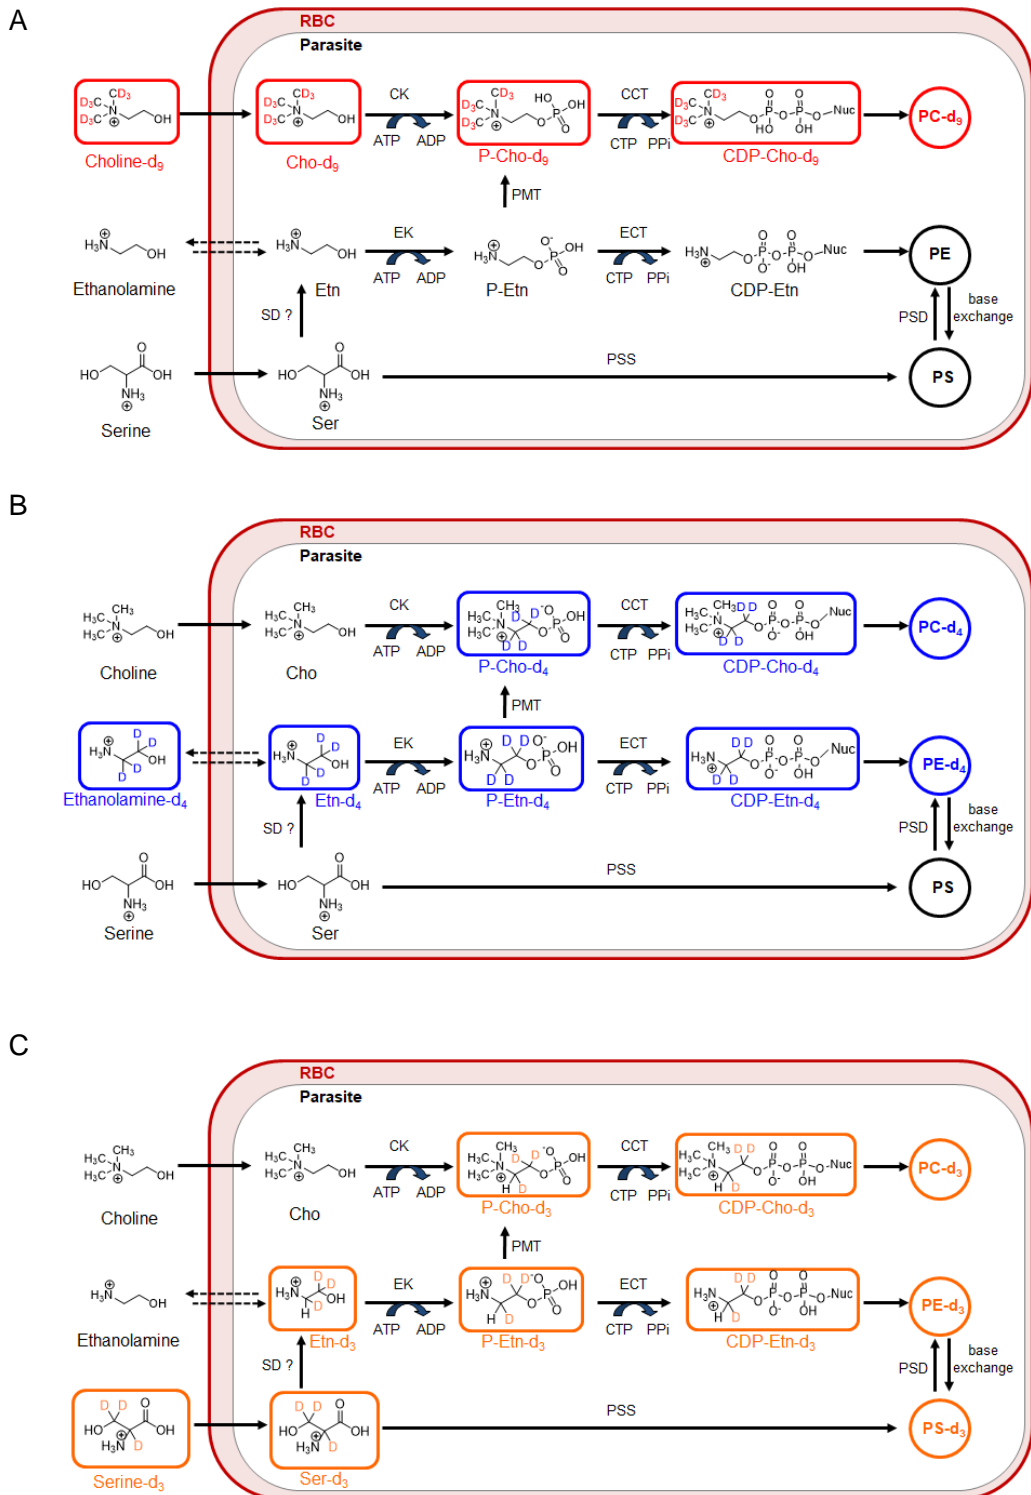

**Supplemental Figure S1: Principle of deuterium labeling of *P. falciparum* PL metabolism.**

*P. falciparum*-iRBCs were incubated 48 h or 96 h in several culture media in the presence of 20  $\mu\text{M}$  Cho- $\text{d}_9$ , 10  $\mu\text{M}$  Etn- $\text{d}_4$  and 140  $\mu\text{M}$  Ser- $\text{d}_3$ . After incubation, PL and reaction intermediates were extracted and quantified by LC-MS/MS. **(A)** Molecules labeled with “ $\text{d}_9$ ” were synthesized from Cho- $\text{d}_9$ . **(B)** Molecules labeled with “ $\text{d}_4$ ” were synthesized from Etn- $\text{d}_4$ . **(C)** Molecules labeled with “ $\text{d}_3$ ” were synthesized from Ser- $\text{d}_3$ . The contributions of Cho- $\text{d}_9$ , Etn- $\text{d}_4$  and Ser- $\text{d}_3$  to biosynthesis of PLs can thus be determined.

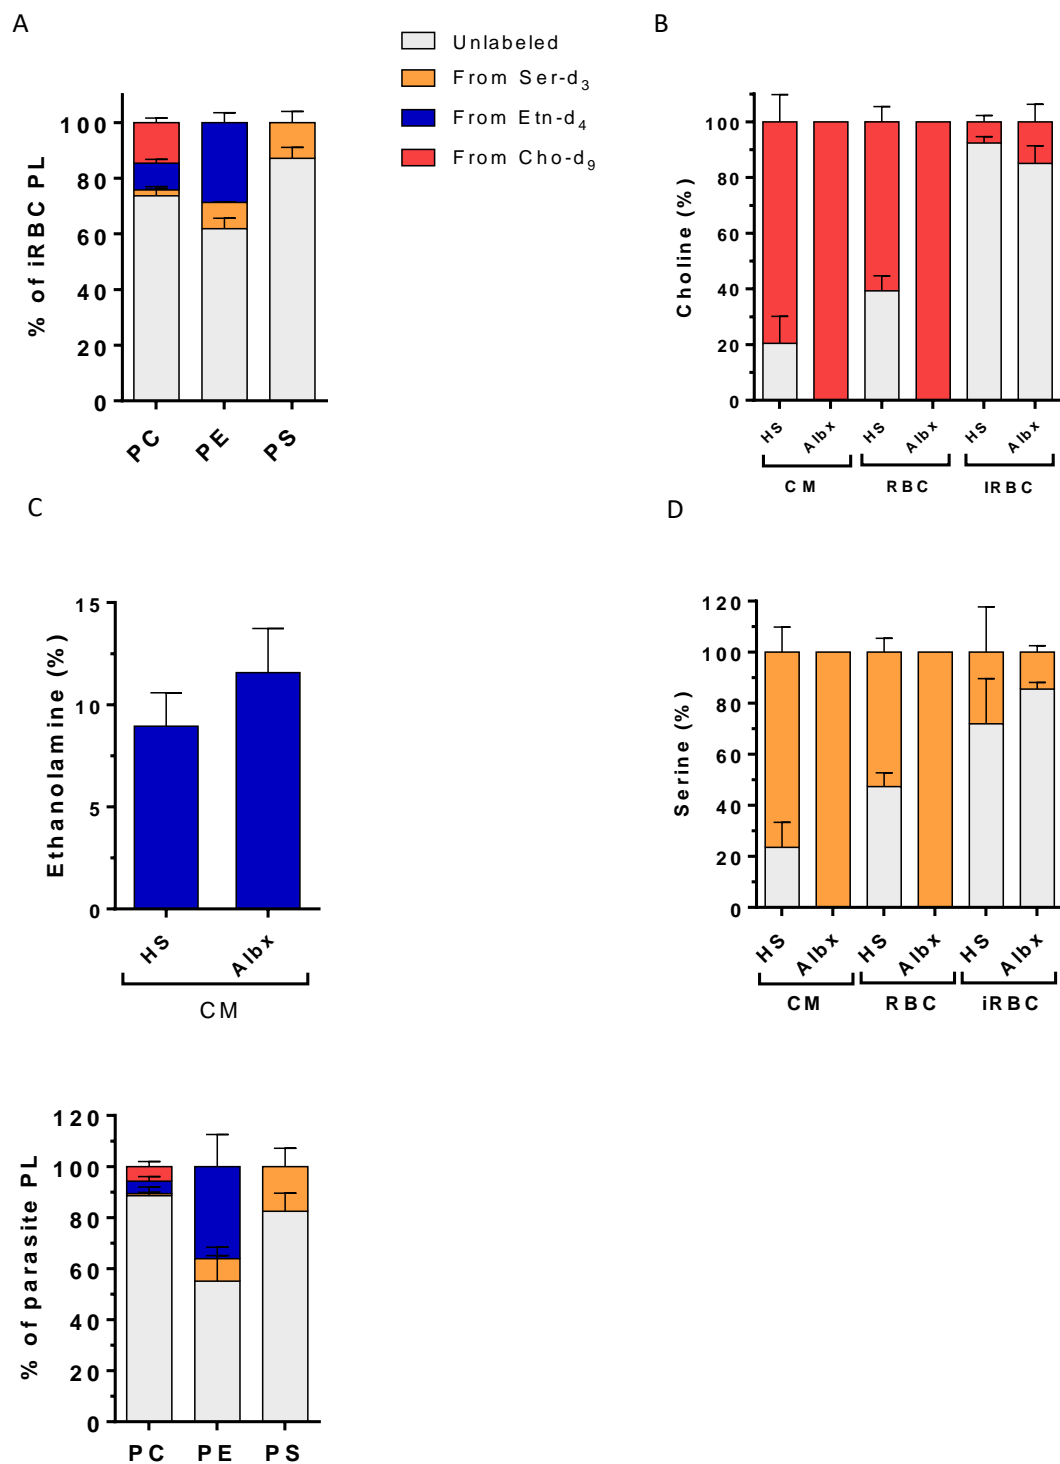

**Supplemental Figure S2: Quantification and origin of PC, PE and PS in *P. falciparum*-iRBC and isolated parasites.** *P. falciparum*-iRBC were incubated 48h in culture medium supplemented with 0.5% albumax I in the presence of 20  $\mu$ M Cho-d<sub>9</sub>, 10  $\mu$ M Etn-d<sub>4</sub> and 140  $\mu$ M Ser-d<sub>3</sub>. After incubation, a fraction was treated with saponin to obtain isolated parasites. After extraction, phospholipids and reaction intermediates were quantified by LC-MS/MS. **(A)** Quantification of total PC, PE and PS in iRBC. **(B to D)** Quantification of the precursors Cho (B), Etn (C) and serine (D) in culture medium (CM) and RBC in the presence of 10% human serum (HS) or 0.5% albumax (Albx) **(E)** Quantification of total PC, PE and PS in isolated parasites. The same color code is used for all the panels.

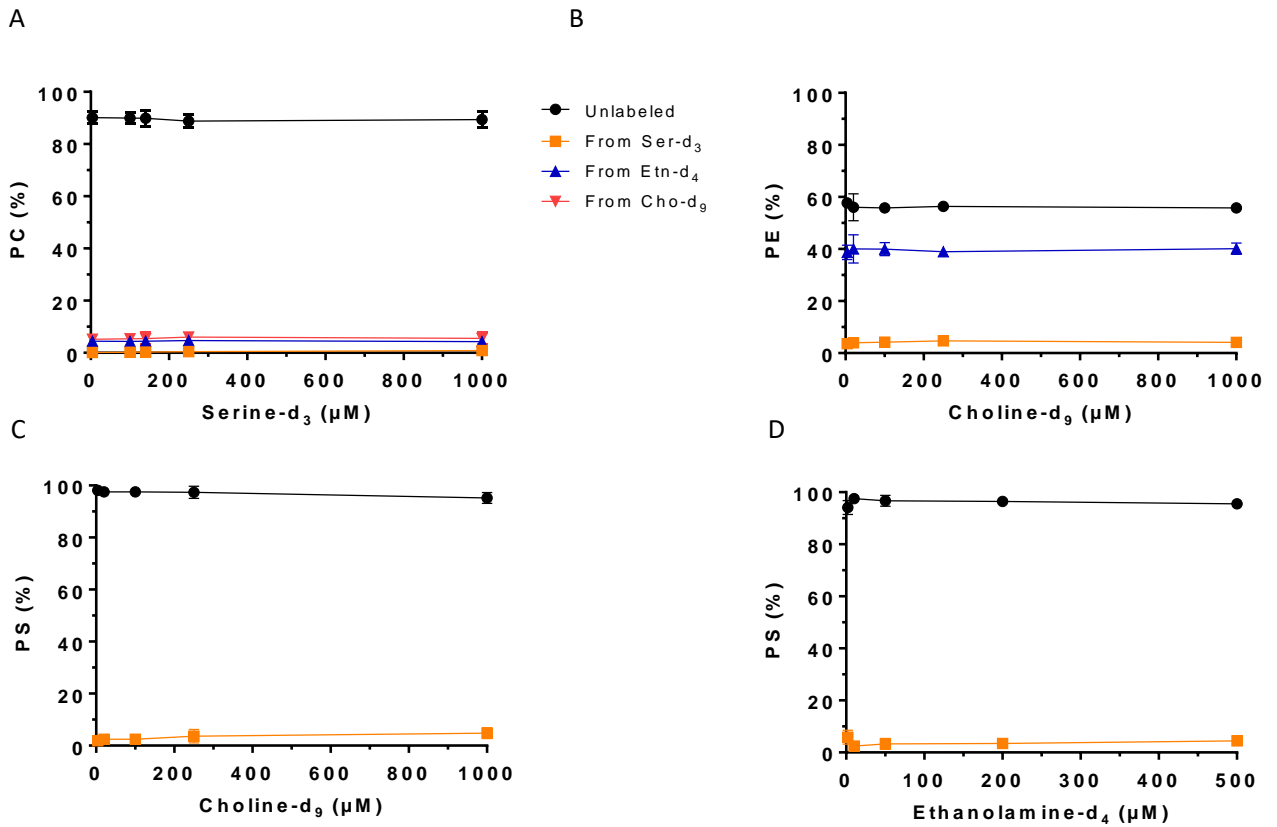

**Supplemental Figure S3: Effect of varying precursor concentrations on the PC, PE and PS biosynthesis pathways in *P. falciparum*-iRBC.** *P. falciparum*-iRBCs were incubated 96 h in culture medium supplemented with 10% human serum in the presence of increasing concentrations of Cho-d<sub>9</sub>, Etn-d<sub>4</sub> or Ser-d<sub>3</sub> while the two others labeled precursors remained at fixed concentrations. Fixed concentrations were 20 µM Cho-d<sub>9</sub>, 10 µM Etn-d<sub>4</sub> and 140 µM Ser-d<sub>3</sub>. After incubation, PLs were quantified by LC-MS/MS. **(A)** Impact of Ser-d<sub>3</sub> concentration on PC biosynthesis. **(B)** Impact of Cho-d<sub>9</sub> concentration on PE biosynthesis. **(C)** Impact of Cho-d<sub>9</sub> and Etn-d<sub>4</sub> **(D)** concentrations on PS biosynthesis. Results are shown as means ± s.d. of three independent experiments. The same color code was used for all the panels.
